# Supplementary material
Source: publisher figshare collection journal article supplement (https://acs.figshare.com/ndownloader/files/5099938)
Supplement: Supplementary file 1 [file 5099938]

## Supporting Materials for

### Activation of C-H Bonds of Arenes: Selectivity and Reactivity in Bis(pyridyl) Platinum(II) Complexes

Fenbao Zhang, Christopher W. Kirby, Douglas W. Hairsine, Michael C. Jennings and Richard J. Puddephatt\*

*Department of Chemistry, The University of Western Ontario, London, Canada N6A 5B7.*

#### General methods

All reactions were carried under an N<sub>2</sub> atmosphere using standard Schlenk techniques or using a drybox. NMR spectra were recorded by using a Varian Mercury 400 or 600 MHz spectrometer. <sup>1</sup>H and <sup>19</sup>F NMR chemical shifts are reported relative to TMS and CFC1<sub>3</sub> respectively.

#### Preparation of the complexes.

**[PtMe<sub>2</sub>(DPM)], 1c.** To a solution of [Pt<sub>2</sub>Me<sub>4</sub>(μ-SMe<sub>2</sub>)<sub>2</sub>] (0.385 g, 0.670 mmol) in ether (15 mL) was added a solution containing DPM (0.228 g, 1.34 mmol) in ether (10 mL). The solution immediately turned pale orange, and the product precipitated as pale orange solid over 30 min. The product was collected by filtration, washed with ether/pentane and dried under vacuum. Yield: 89%. NMR in CDCl<sub>3</sub>: δ(<sup>1</sup>H) = 0.90 [s, 6H, <sup>2</sup>J(PtH) = 83 Hz, 2PtMe]; 4.00 [br, 1H, CH<sub>2</sub>]; 4.74 [br, 1H, CH<sub>2</sub>]; 7.19 [m, 2H, Py H<sup>5</sup>]; 7.37 [d, 2H, Py H<sup>3</sup>]; 7.77 [td, 2H, Py H<sup>4</sup>]; 8.87 [m, 2H, <sup>3</sup>J(PtH) = 22 Hz, Py H<sup>6</sup>]; <sup>13</sup>C NMR(CDCl<sub>3</sub>): -18.3 [s, <sup>1</sup>J(PtC) = 813 Hz, 2PtMe]; 47.5 [s, <sup>3</sup>J(PtC) = 52 Hz, CH<sub>2</sub>]; 124.3 [s, <sup>2</sup>J(PtC) = 22 Hz, Py C<sup>2</sup>]; 124.7 [s, Py C<sup>3</sup>]; 136.9 [s, Py C<sup>4</sup>]; 150.5 [s, <sup>2</sup>J(PtC) = 25 Hz, Py C<sup>6</sup>]; 155.1 [s, Py C<sup>5</sup>]. ESI-MS (m/z): 417 [PtMe<sub>2</sub>(DPM)+Na]<sup>+</sup>. NaI was used as the ionizing reagent. The dimethylplatinum(II) complexes **1a** and **1b** were prepared similarly.<sup>1</sup>

**[PtMe{HOB(C<sub>6</sub>F<sub>5</sub>)<sub>3</sub>}(DPK)], 2a.** To a solution of [PtMe<sub>2</sub>(DPK)], **1a**, (0.41 g, 1 mmol) in CF<sub>3</sub>CH<sub>2</sub>OH (30 mL) was added a solution of B(C<sub>6</sub>F<sub>5</sub>)<sub>3</sub> (0.54 g, 1 mmol) in CF<sub>3</sub>CH<sub>2</sub>OH (10 mL). The color changed from purple to yellow orange. The mixture was stirred for 6h, and the yellow precipitate of the product was separated by filtration and washed with ether (3×2 mL) and pentane (3×10 mL), and dried under vacuum. Yield: 86%. Anal. Calcd for C<sub>30</sub>H<sub>12</sub>BF<sub>15</sub>N<sub>2</sub>O<sub>2</sub>Pt: C, 39.03; H, 1.31; N, 3.03. Found: C, 39.54; H, 1.34; N, 3.27%. NMR in CD<sub>2</sub>Cl<sub>2</sub>: δ(<sup>1</sup>H) = 0.96 [s, 3H, <sup>2</sup>J(PtH) = 73 Hz, Pt-Me]; 3.30 [m, 1H, OH]; 7.50 – 8.80 [8H, py]. δ(<sup>19</sup>F) = -134.3 [br m, 6F, *o*-F]; -160.2 [t, 3F, *p*-F]; -165.4 [dt, 6F, *m*-F]. δ(<sup>13</sup>C) = -13.9 [PtMe]; 125.4, 127.4, 129.1, 129.2, 137.8, 139.1, 149.5, 149.9, 153.5, 153.9 [py]; 135.6; 138.2; 146.5; 148.8 [C<sub>6</sub>F<sub>5</sub>]; 185.9 [CO].

**[PtMe{HOB(C<sub>6</sub>F<sub>5</sub>)<sub>3</sub>}(DPA)], 2b.** This was prepared in a similar way from [PtMe<sub>2</sub>(DPA)], and isolated as a pale brown solid. Yield 84%. Anal. Calcd for C<sub>29</sub>H<sub>13</sub>BF<sub>15</sub>N<sub>3</sub>O<sub>2</sub>Pt: C, 38.26; H, 1.44; N, 4.62. Found: C, 38.59; H, 1.33; N, 4.47%. NMR in CD<sub>2</sub>Cl<sub>2</sub>:  $\delta(^1\text{H})$  = 0.86 [s, 3H,  $^2\text{J}(\text{PtH}) = 72$  Hz, Pt-Me]; 3.70 [m, 1H, OH]; 5.70 [1H, NH]; 6.38 – 8.51 [8H, py].  $\delta(^{19}\text{F})$  = -134.1 [br m, 6F, *o*-F]; -160.1 [t, 3F, *p*-F]; -165.2 [dt, 6F, *m*-F].

**[PtMe{O(H)B(C<sub>6</sub>F<sub>5</sub>)<sub>3</sub>}(DPM)], 2c.** This was prepared in a similar way from [PtMe<sub>2</sub>(DPM)], and isolated as a pale brown solid. Yield: 91 %.  $^1\text{H}$  NMR (acetone-*d*<sub>6</sub>): 0.86 [s, 3H,  $^2\text{J}(\text{PtH}) = 74$  Hz, PtMe]; 3.64 [sept., 1H, OH]; 4.10 [d, 1H,  $^2\text{J}(\text{HH}) = 14$  Hz, CH<sub>2</sub>]; 4.48 [d, 1H,  $^2\text{J}(\text{HH}) = 14$  Hz, CH<sub>2</sub>]; 7.33 [t, 1H, Py H<sup>5</sup>]; 7.44 [t, 1H, Py H<sup>5</sup>]; 7.67 [d, 1H, PyH<sup>3</sup>]; 7.70 [d, 1H, PyH<sup>3</sup>]; 7.96 [t, 1H, Py H<sup>4</sup>]; 8.01 [t, 1H, Py H<sup>4</sup>]; 8.64 [d, 1H,  $^3\text{J}(\text{PtH}) = 68$  Hz, PyH<sup>6</sup>]; 8.76 [d, 1H, Py H<sup>6</sup>].  $^{19}\text{F}$  NMR (acetone-*d*<sub>6</sub>): -134.1 [br, 6F, *o*-F]; -162.0 [t, 3F, *p*-F]; -166.9 [t, 6F, *m*-F]. ESI-MS (*m/z*): 922 [PtMe<sub>2</sub>(DPM){O(H)B(C<sub>6</sub>F<sub>5</sub>)<sub>3</sub>}+Na]<sup>+</sup>. NaI was used as the ionizing reagent.

**[PtMe(DPK)(CO)]<sup>+</sup>[O(H)B(C<sub>6</sub>F<sub>5</sub>)<sub>3</sub>]<sup>-</sup>, 3a.** Yield: 88 %. NMR in CD<sub>2</sub>Cl<sub>2</sub>:  $\delta(^1\text{H})$  = 1.09 [s, 3H,  $^2\text{J}(\text{PtH}) = 70$  Hz, PtMe]; 4.17 [m, 1H, O(H)B]; 7.42 [t, br, 2H, Py H<sup>5</sup> & H<sup>5</sup>]; 7.92 [d, 2H,  $^3\text{J}(\text{HH}) = 8$  Hz, Py H<sup>3</sup>, H<sup>3</sup>]; 8.03 [t, 2H,  $^3\text{J}(\text{HH}) = 7$  Hz, Py H<sup>4</sup>, H<sup>4</sup>]; 8.60 [d, br, 2H, Py H<sup>6</sup>, H<sup>6</sup>].  $\delta(^{19}\text{F})$  = -136.3 [d, 6F, *o*-F]; -162.1 [t, br, 3F, *p*-F]; -166.6 [t, 6F, *m*-F]. IR: 2073 cm<sup>-1</sup> (CO). ESI-MS (*m/z*): 422 (M<sup>+</sup>).

**[PtMe(DPA)(CO)]<sup>+</sup>[O(H)B(C<sub>6</sub>F<sub>5</sub>)<sub>3</sub>]<sup>-</sup>, 3b.** Yield: 91 %. NMR in CD<sub>2</sub>Cl<sub>2</sub>:  $\delta(^1\text{H})$  = 1.00 [s, 3H,  $^2\text{J}(\text{PtH}) = 68$  Hz, PtMe]; 7.10 [t, 1H, Py H<sup>5</sup>]; 7.12 [t, 1H, Py H<sup>5</sup>]; 7.46 [d, 1H, Py H<sup>4</sup>]; 7.52 [d, 1H, Py H<sup>4</sup>]; 7.82 [t, br, 2H, Py H<sup>3</sup>, H<sup>3</sup>]; 8.17 [d, 1H,  $^3\text{J}(\text{PtH}) = 34$  Hz, Py H<sup>6</sup>]; 8.28 [d, 1H, Py H<sup>6</sup>]; 12.08 [s, 1H, NH]. NMR(CD<sub>2</sub>Cl<sub>2</sub>):  $\delta(^{13}\text{C})$  = -13.9 [s,  $^1\text{J}(\text{PtC}) = 520$  Hz, PtMe]; 163.2 [s,  $^1\text{J}(\text{PtC}) = 1821$  Hz, PtCO].  $\delta(^{19}\text{F})$  = -136.3 [d, 6F, *o*-F]; -161.8 [t, 3F, *p*-F]; -166.3 [t, 6F, *m*-F]. IR: 2105 cm<sup>-1</sup> (CO). ESI-MS (*m/z*): 409 (M<sup>+</sup>).

**[PtMe(DPM)(CO)]<sup>+</sup>[O(H)B(C<sub>6</sub>F<sub>5</sub>)<sub>3</sub>]<sup>-</sup>, 3c.** Yield: 91 %. NMR in CD<sub>2</sub>Cl<sub>2</sub>:  $\delta(^1\text{H})$  = 1.26 [s, 3H,  $^2\text{J}(\text{PtH}) = 70$  Hz, PtMe]; 4.42 [br, 1H, CH<sub>2</sub>]; 4.64 [br, 1H, CH<sub>2</sub>]; 7.52 [t, 1H, Py H<sup>5</sup>]; 7.61 [t, 1H, Py H<sup>5</sup>]; 7.76 [d, 1H, Py H<sup>4</sup>]; 7.8 [d, 1H, Py H<sup>4</sup>]; 8.03 [t, 1H, Py H<sup>3</sup>]; 8.09 [t, 1H, Py H<sup>3</sup>]; 8.52 [d, 1H,  $^3\text{J}(\text{PtH}) = 44$  Hz, Py H<sup>6</sup>]; 8.72 [d, 1H, Py H<sup>6</sup>].  $\delta(^{13}\text{C})$  = -14.2 [PtMe]; 45.7 [CH<sub>2</sub>].  $\delta(^{19}\text{F})$  = -136.4 [d, 6F,  $^3\text{J}(\text{FF}) = 23$  Hz, *o*-F]; -163.8 [t, 3F,  $^3\text{J}(\text{FF}) = 20$  Hz, *p*-F]; -167.3 [t, 6F,  $^3\text{J}(\text{FF}) = 19$  Hz, *m*-F]. IR: 2109 cm<sup>-1</sup> (CO). ESI-MS (*m/z*): 408 (M<sup>+</sup>).

**[PtPh{HOB(C<sub>6</sub>F<sub>5</sub>)<sub>3</sub>}(DPK)], 4a.** To a solution of complex **1a** (0.41 g, 1 mmol) in CF<sub>3</sub>CH<sub>2</sub>OH (30 mL) was added a solution of B(C<sub>6</sub>F<sub>5</sub>)<sub>3</sub> (0.54 g, 1 mmol) in CF<sub>3</sub>CH<sub>2</sub>OH (10 mL), followed by addition of C<sub>6</sub>H<sub>6</sub> (30 mmol), to give a yellow-orange solution. After 4 days, the yellow precipitate of the product was separated by filtration, washed with ether (3×2 mL) and pentane (3×10 mL), and dried under vacuum. Yield: 88%. Anal. Calcd for C<sub>35</sub>H<sub>14</sub>BF<sub>15</sub>N<sub>2</sub>O<sub>2</sub>Pt: C, 42.66; H, 1.43; N, 2.84. Found: C, 42.31; H, 1.41; N, 2.77%. NMR in C<sub>6</sub>D<sub>6</sub>:  $\delta(^1\text{H})$  = 3.93 [br, 1H, PtOH]; 5.58 – 8.68 [8H, py]; 7.05 [t, 1H,  $^5\text{J}(\text{PtH}) = 31$  Hz, Ph, *p*-H]; 7.08 [t, 2H,  $^4\text{J}(\text{PtH}) = 47$  Hz, Ph, *m*-H]; 7.16 [br, m, 2H, Ph, *o*-H].  $\delta(^{19}\text{F})$  = -132.6 [br m, 6F, *o*-F]; -158.9 [t, 3F, *p*-F]; -164.4 [dt, 6F, *m*-F].

**[PtPh{O(H)B(C<sub>6</sub>F<sub>5</sub>)<sub>3</sub>}(DPA)], 4b.** This was prepared similarly but using [PtMe<sub>2</sub>(DPA)] (0.40 g, 1 mmol). Yield: 78%. Anal. Calcd for C<sub>34</sub>H<sub>15</sub>BF<sub>15</sub>N<sub>3</sub>O<sub>2</sub>Pt: C, 41.32; H, 1.53; N, 4.25. Found: C, 41.68; H, 1.49; N, 4.64. NMR in C<sub>6</sub>D<sub>6</sub>:  $\delta(^1\text{H})$  = 3.91 [br, 1H, PtOH]; 5.62 [td, 1H]; 6.42 [td, 1H]; 6.63 [td, 1H]; 6.92 [td, 1H]; 6.96 [dd, 1H]; 7.13 [t, br, 1H, Ph, *p*-H]; 7.17 [t, br, 2H, Ph, *m*-H]; 7.22 [br, 2H, Ph, *o*-H]; 7.31 [d, 2H]; 7.82 [dd, 1H, <sup>3</sup>J(PtH) = 74 Hz, PtNCH *trans* to O]; 8.75 [dd, 1H, NCH *trans* to Ph].  $\delta(^{19}\text{F})$  = -132.6 [b, 6F, *o*-F]; -158.9 [t, 3F, *p*-F]; -164.4 [td, 6F, *m*-F].

**[PtPh{O(H)B(C<sub>6</sub>F<sub>5</sub>)<sub>3</sub>}(DPM)], 4c.** This was prepared similarly but using [PtMe<sub>2</sub>(DPM)] (0.40 g, 1 mmol). Yield: 78%. NMR in CD<sub>2</sub>Cl<sub>2</sub>:  $\delta(^1\text{H})$  = 3.51 [septet, 1H, O(H)B(C<sub>6</sub>F<sub>5</sub>)<sub>3</sub>]; 4.10 [d, 1H, <sup>2</sup>J(HH) = 14 Hz, CH<sub>2</sub>]; 4.42 [d, 1H, <sup>2</sup>J(HH) = 14 Hz, CH<sub>2</sub>]; 6.88 [t, br, 2H, Ph, *m*-H]; 6.90 [t, br, 1H, Ph, *p*-H]; 6.93 [t, 1H, Py H<sup>5</sup>]; 7.04 [d, br, 2H, Ph, *o*-H]; 7.33 [t, Py H<sup>5</sup>]; 7.40 [d, 1H, Py H<sup>3</sup>]; 7.42 [d, 1H, Py H<sup>3</sup>]; 7.77 [td, 1H, Py H<sup>4</sup>]; 7.81 [td, 1H, Py H<sup>4</sup>]; 8.34 [d, 1H, Py H<sup>6</sup>]; 8.71 [d, 1H, Py H<sup>6</sup>].  $\delta(^{13}\text{C})$  = 46.2 [CH<sub>2</sub>]; 123.9, 124.2, 124.3, 124.6; 125.5, 127.0, 135.1, 135.8, 138.9, 139.3, 150.4, 152.9, 154.8, 156.1; 136.0, 137.5, 138.3, 140.0, 146.9, 148.5.  $\delta(^{19}\text{F})$  = -133.5 [br, 6F, *o*-F]; -161.1 [t, 3F, *p*-F]; -165.9 [t, 6F, *m*-F]. ESI-MS (m/z): 994 [PtPhX(DPM)+Na]<sup>+</sup>. NaI was used as the ionizing reagent.

**[Pt(C<sub>6</sub>H<sub>4</sub>Me){HOB(C<sub>6</sub>F<sub>5</sub>)<sub>3</sub>}(DPK)], 5a.** This was prepared in a similar way to **4a** but using toluene (30 mmol). Yield: 86%. Anal. Calcd for C<sub>36</sub>H<sub>16</sub>BF<sub>15</sub>N<sub>2</sub>O<sub>2</sub>Pt: C, 43.27; H, 1.61; N, 2.80. Found: C, 42.83; H, 1.31; N, 3.27%. NMR in CD<sub>2</sub>Cl<sub>2</sub>: *meta*-**8**:  $\delta(^1\text{H})$  = 2.15 [s, 3H, Me]; 3.53 [1H, OH]; 6.73 [d, 1H, tolyl H<sup>4</sup>]; 6.77 [t, 1H, tolyl H<sup>5</sup>]; 6.78 [s, 1H, tolyl H<sup>2</sup>]; 6.84 [d, 1H, tolyl H<sup>6</sup>]; 7.21 – 8.89 [8H, py];  $\delta(^{19}\text{F})$  = -133.2 [br m, 6F, *o*-F]; -160.5 [t, 3F, *p*-F]; -165.7 [m, 6F, *m*-F]. *para*-**8**:  $\delta(^1\text{H})$  = 2.24 [s, 3H, Me]; 3.48 [1H, OH]; 6.68, 6.70 [m, 4H, tolyl]; 7.21 – 8.89 [8H, py];  $\delta(^{19}\text{F})$  = -133.0 [br m, 6F, *o*-F]; -160.7 [t, 3F, *p*-F]; -165.6 [m, 6F, *m*-F]. *ortho*-**8**: 2.34 [3H, Me]; 3.32 [1H, OH]; 7.14, 6.96 [m, tolyl]; other tolyl protons obscured. Isomer ratio obtained by integration of methyl resonances of the *o*-, *m*-, and *p*-tolyl groups.

**[Pt(C<sub>6</sub>H<sub>4</sub>Me){HOB(C<sub>6</sub>F<sub>5</sub>)<sub>3</sub>}(DPA)], 5b.** This was prepared in a similar way using [PtMe<sub>2</sub>(DPA)] and toluene. The product formed as an off-white precipitate. Yield: 84%. Anal. Calcd for C<sub>35</sub>H<sub>17</sub>BF<sub>15</sub>N<sub>3</sub>OPt: C, 43.22; H, 1.91; N, 4.28. Found: C, 42.93; H, 1.99; N, 4.37%. NMR in CD<sub>2</sub>Cl<sub>2</sub>: *meta*-**9**:  $\delta(^1\text{H})$  = 2.15 [s, 3H, Me]; 3.53 [1H, OH]; 6.74 [d, 1H, tolyl H<sup>4</sup>]; 6.86 [d, 1H, tolyl H<sup>6</sup>]; 7.03 [t, 1H, tolyl H<sup>5</sup>]; 7.13 [s, 1H, tolyl H<sup>2</sup>]; 6.60 – 8.52 [8H, py];  $\delta(^{19}\text{F})$  = -133.2 [br m, 6F, *o*-F]; -160.5 [t, 3F, *p*-F]; -165.7 [m, 6F, *m*-F]. *para*-**9**:  $\delta(^1\text{H})$  = 2.24 [s, 3H, Me]; 3.40 [1H, OH]; 6.62, 6.68 [m, 4H, tolyl]; 6.77 – 8.52 [8H, py]; *ortho*-**8**: Tol-Me: 2.34 [3H, Me]; 3.32 [1H, OH]; 6.96, 7.14, [m, tolyl]; other tolyl protons obscured. Isomer ratio obtained by integration of methyl resonances of the *o*-, *m*-, and *p*-tolyl groups.

**[Pt(3,4-C<sub>6</sub>H<sub>3</sub>Me<sub>2</sub>){HOB(C<sub>6</sub>F<sub>5</sub>)<sub>3</sub>}(DPK)], 6a.** This was prepared in the same way as complex **4a**, but using *o*-xylene (30 mmol). Reaction was complete in 4 h. Yield: 87%. Anal. Calcd for C<sub>37</sub>H<sub>18</sub>BF<sub>15</sub>N<sub>2</sub>O<sub>2</sub>Pt: C, 43.85; H, 1.79; N, 2.76. Found: C, 43.66; H, 1.98; N, 2.51%. NMR in CD<sub>2</sub>Cl<sub>2</sub>:  $\delta(^1\text{H})$  = 2.06 [s, 3H, Me]; 2.17 [s, 3H, Me]; 3.49 [m, 1H, OH]; 6.63 [d, 1H, Xy H<sup>6</sup>]; 6.67 [d, 1H, Xy H<sup>5</sup>]; 6.74 [s, 1H, Xy H<sup>2</sup>]; 7.22–8.90 [8H, py].  $\delta(^{19}\text{F})$  = -133.1 [br m, 6F, *o*-F]; -160.7 [t, 3F, *p*-F]; -165.8 [m, 6F, *m*-F].  $\delta(^{13}\text{C})$  = 18.7,

19.2; 125.3, 127.6, 128.4, 128.8, 128.8, 132.8, 132.9, 135.1, 136.3, 139.6, 139.7, 150.0, 150.1, 154.9; 186.0.

**[Pt(3,4-C<sub>6</sub>H<sub>3</sub>Me<sub>2</sub>){O(H)B(C<sub>6</sub>F<sub>5</sub>)<sub>3</sub>}(DPM)], 6c.** This was prepared similarly but using [PtMe<sub>2</sub>(DPM)] (0.40 g, 1 mmol). Yield: 78%. NMR in CD<sub>2</sub>Cl<sub>2</sub>:  $\delta(^1\text{H})$  = 2.06 [s, 3H, *o*-xylene Me]; 2.18 [s, 3H, *o*-xylene Me]; 3.48 [sept., 1H, O(H)B(C<sub>6</sub>F<sub>5</sub>)<sub>3</sub>]; 4.08 [d, 1H, <sup>2</sup>J(HH) = 14 Hz, CH<sub>2</sub>]; 4.42 [d, 1H, <sup>2</sup>J(HH) = 14 Hz, CH<sub>2</sub>]; 6.69 [d, 1H, <sup>3</sup>J(HH) = 7 Hz, *o*-xylene H<sup>6</sup>]; 6.76 [d, 1H, <sup>3</sup>J(HH) = 7 Hz, *o*-xylene H<sup>5</sup>]; 6.79 [s, <sup>3</sup>J(PtH) = 37 Hz, *o*-xylene H<sup>2</sup>]; 6.94 [t, 1H, Py H<sup>5</sup>]; 7.32 [t, 1H, Py H<sup>5</sup>]; 7.40 [d, 2H, Py H<sup>3</sup> & H<sup>3'</sup>]; 7.70 [td, 1H, Py H<sup>4</sup>]; 7.80 [td, 1H, <sup>4</sup>J(HH) = 1 Hz, Py H<sup>4</sup>]; 8.45 [d, 1H, <sup>3</sup>J(PtH) = 72 Hz, Py H<sup>6</sup>]; 8.69 [d, 1H, Py H<sup>6</sup>].  $\delta(^{13}\text{C})$  = 17.5, 20.0 [Me]; 47.0 [CH<sub>2</sub>].  $\delta(^{19}\text{F})$  = -132.6 [br, 6F, *o*-F]; -160.6 [t, 3F, *p*-F]; -165.4 [t, 6F, *m*-F]. EI-MS (m/z): 999 [M].

**Attempted synthesis of [Pt(3,4-C<sub>6</sub>H<sub>3</sub>Me<sub>2</sub>){O(H)B(C<sub>6</sub>F<sub>5</sub>)<sub>3</sub>}(bu<sub>2</sub>bpy)], 6d.** The reaction of [PtMe<sub>2</sub>(bu<sub>2</sub>bpy)], **1d**, (0.40 g, 1 mmol) with *o*-xylene was carried out as above and monitored by <sup>1</sup>H NMR. After one day at room temperature, the known complex [PtMe{O(H)B(C<sub>6</sub>F<sub>5</sub>)<sub>3</sub>}(bu<sub>2</sub>bpy)] was still present. At 60°C, a complex reaction occurred and eventually led to formation of crystals of [Pt<sub>2</sub>(μ-OH)<sub>2</sub>(bu<sub>2</sub>bpy)<sub>2</sub>][B(OH)(C<sub>6</sub>F<sub>5</sub>)<sub>3</sub>]<sub>2</sub>, which was identified crystallographically. There was no evidence for formation of xylylplatinum complexes.

**[Pt(3,5-C<sub>6</sub>H<sub>3</sub>Me<sub>2</sub>){HOB(C<sub>6</sub>F<sub>5</sub>)<sub>3</sub>}(DPK)], 7a.** This was prepared similarly to **4a** but using *m*-xylene (30 mmol). Yield: 86%. Anal. Calcd for C<sub>37</sub>H<sub>18</sub>BF<sub>15</sub>N<sub>2</sub>O<sub>2</sub>Pt: C, 43.85; H, 1.79; N, 2.76. Found: C, 43.51; H, 2.08; N, 2.59%. NMR in CD<sub>2</sub>Cl<sub>2</sub>:  $\delta(^1\text{H})$  = 2.08 [s, 6H, Me]; 3.49 [m, 1H, OH]; 6.51 [s, 2H, Xy H<sup>2</sup>, H<sup>6</sup>]; 6.48 [s, 1H, Xy H<sup>4</sup>]; 7.20-8.89 [8H, py].  $\delta(^{19}\text{F})$  = -133.2 [br, m, 6F, *o*-F]; -160.7 [t, 3F, *p*-F]; -165.8 [m, 6F, *m*-F].  $\delta(^{13}\text{C})$  = 20.9; 125.3, 126.6, 127.5, 128.8, 128.8, 132.9, 134.4, 136.2, 139.6, 139.7, 150.1, 153.2, 155.0; 186.0.

**[Pt(3,5-C<sub>6</sub>H<sub>3</sub>Me<sub>2</sub>){O(H)B(C<sub>6</sub>F<sub>5</sub>)<sub>3</sub>}(DPA)], 7b.** This was prepared similarly using [PtMe<sub>2</sub>(DPA)] (0.117 g, 0.3 mmol). Yield: 88%. Anal. Calcd for C<sub>36</sub>H<sub>19</sub>BF<sub>15</sub>N<sub>3</sub>OPt: C, 43.22; H, 1.91; N, 4.20. Found: C, 42.51; H, 2.06; N, 4.52. NMR in C<sub>6</sub>D<sub>6</sub>:  $\delta(^1\text{H})$  = 2.33 [s, 6H, 2Me of *m*-xy]; 3.83 [m, 1H, O(H)B(C<sub>6</sub>F<sub>5</sub>)<sub>3</sub>]; 5.23 [d, 1H]; 5.42 [t, 1H]; 5.50 [s, NH]; 5.57 [d, 1H]; 6.34 [t, 1H]; 6.40 [t, 1H]; 6.73 [s, 1H, *m*-xy H<sup>4</sup>]; 6.79 [t, 1H]; 7.05 [s, 2H, *m*-xy H<sup>2,6</sup>]; 8.05 [d, 1H, <sup>3</sup>J(PtH) = 80 Hz, PtNCH, *trans* to O]; 8.53 [d, 1H, PtNCH, *trans* to *m*-xy].  $\delta(^{19}\text{F})$  = 132.7 [br, 6F, *o*-F]; -161.2 [t, 3F, *p*-F]; -165.8 [td, 6F, *m*-F].

**[Pt(C<sub>6</sub>H<sub>4</sub>OMe){HOB(C<sub>6</sub>F<sub>5</sub>)<sub>3</sub>}(DPK)], 8a.** This was prepared similarly, but using anisole (30 mmol). Yield: 48%. Anal. Calcd for C<sub>36</sub>H<sub>16</sub>BF<sub>15</sub>N<sub>2</sub>O<sub>3</sub>Pt: C, 42.58; H, 1.61; N, 2.80. Found: C, 42.64; H, 1.81; N, 2.72%. NMR in CD<sub>2</sub>Cl<sub>2</sub>: *ortho*-**12**:  $\delta(^1\text{H})$  = 4.01 [s, 3H, OMe]; 4.81 [m, br, 1H, OH]; 6.29 [d, 1H, An H<sup>6</sup>]; 6.39 [t, 1H, An H<sup>5</sup>]; 6.68 [d, 1H, An H<sup>3</sup>]; 6.90 [dt, 1H, An H<sup>4</sup>]; 7.21-9.01 [8H, py].  $\delta(^{19}\text{F})$  = -134.5 [br m, 6F, *o*-F]; -161.7 [t, 3F, *p*-F]; -166.9 [m, 6F, *m*-F]. *meta*-**12**:  $\delta(^1\text{H})$  = 3.75 [s, 3H, OMe]; 3.70 [m, br, 1H, OH]; 6.51 [s, 1H, An H<sup>2</sup>]; 6.56 [d, 1H, An H<sup>6</sup>]; 6.83 [t, 1H, An H<sup>5</sup>]; 6.90 [d, 1H, An H<sup>4</sup>]; 7.25-8.97 [8H, py]. *para*-**12**:  $\delta(^1\text{H})$  = 3.72 [s, 3H, OMe]; 3.69 [m, br, 1H, OH]; 6.44 [d, 2H, An H<sup>2,6</sup>]; 6.54 [d, 2H, An H<sup>3,5</sup>]; 7.3-8.9 [8H, py].

**[Pt{2,4-C<sub>6</sub>H<sub>3</sub>(OMe)<sub>2</sub>}{HOB(C<sub>6</sub>F<sub>5</sub>)<sub>3</sub>}(DPK)], 9a.** This was prepared similarly, but using 1,3-dimethoxybenzene (30 mmol). Yield: 40%. Anal. Calcd for C<sub>37</sub>H<sub>18</sub>BF<sub>15</sub>N<sub>2</sub>O<sub>4</sub>Pt: C, 42.51; H, 1.74; N, 2.68. Found: C, 42.67; H, 1.86; N, 2.59%. NMR in CD<sub>2</sub>Cl<sub>2</sub>:  $\delta(^1\text{H})$  = 3.71 [s, 3H, 4-OMe]; 3.90 [s, 3H, 2-OMe]; 4.71 [m, br, 1H, OH]; 6.02 [d, 1H, Ar H<sup>5</sup>]; 6.21 [d, 1H, Ar H<sup>6</sup>]; 6.33 [s, 1H, Ar H<sup>3</sup>]; 7.24 – 9.23 [8H, py].  $\delta(^{19}\text{F})$  = -133.5 [br m, 6F, *o*-F]; -160.7 [t, 3F, *p*-F]; -165.9 [m, 6F, *m*-F].

**[Pt(2-MeO-4-Me-C<sub>6</sub>H<sub>3</sub>){HOB(C<sub>6</sub>F<sub>5</sub>)<sub>3</sub>}(DPK)], 10a.** This was prepared similarly, but using 3-methylanisole (30 mmol). Yield: 49%. NMR in CD<sub>2</sub>Cl<sub>2</sub>:  $\delta(^1\text{H})$  = 2.28 [s, 3H, Me]; 3.99 [s, 3H, OMe]; 4.75 [m, br, 1H, OH]; 6.14 [d, 1H, Ar H<sup>6</sup>]; 6.25 [d, 1H, Ar H<sup>5</sup>]; 6.50 [s, 1H, Ar H<sup>3</sup>]; 7.2 – 8.99 [8H, py].  $\delta(^{19}\text{F})$  = -133.2 [br m, 6F, *o*-F]; -160.8 [t, 3F, *p*-F]; -165.8 [m, 6F, *m*-F]. ESI-MS in the presence of NaI to aid ionization: *m/z* = 1052 [14+Na]<sup>+</sup>.

### H/D Exchange Experiments.

The reaction of **1** with *o*-xylene-*d*<sub>10</sub> or anisole-*d*<sub>8</sub> was carried out in a similar way to synthesis of complex **6a** and **8a**, but using the perdeuterated arene. The extent of H/D exchange at each position of the aryl group of the product complex was determined by integration of the corresponding resonance in the <sup>1</sup>H NMR spectrum, using an adjacent pyridyl resonance for calibration.

In a separate experiment, the complexes **6a** and **8a** were dissolved in deuterated alcohol in an NMR tube, but negligible H/D exchange was observed over several days at room temperature under these conditions.

### Competition Reactions

The syntheses were carried out in a similar way as above, but using equimolar amounts of the two arenes. Thus, the relative reactivities of *m*-xylene and *m*-dimethoxybenzene, of *o*-xylene and *o*-xylene-*d*<sub>10</sub>, and of anisole and anisole-*d*<sub>8</sub> were determined by isolation of the products followed by analysis by using <sup>1</sup>H NMR. Aliquots were taken during reaction, evaporated, and analysed as a cross-check.

**X-ray Structure Determinations.** A suitable crystal was mounted on a glass fiber, and data were collected by using a Nonius Kappa-CCD diffractometer. Details of the data collections and structure refinements are given in the CIF files, and the individual structures are illustrated below.

### Reference:

1. Zhang, F.; Jennings, M. C.; Puddephatt, R. J. *Organometallics*, **2004**, 23, 1396. Scott, J.D.; Puddephatt, R.J. *Organometallics*, **1983**, 2, 1643.

**Table S1. Crystal Data and Structure Refinement for the Complexes**

|                                                  | <b>2a</b><br>0.4CH <sub>2</sub> Cl <sub>2</sub> .<br>0.6C <sub>6</sub> H <sub>14</sub>                       | <b>4a</b>                                                                            | <b>6a</b><br>1.5CH <sub>2</sub> Cl <sub>2</sub>                                        | <b>6c</b>                                                              | <b>7a</b>                                                                            | <b>8a</b><br>0.5CH <sub>2</sub> Cl <sub>2</sub>                                        |
|--------------------------------------------------|--------------------------------------------------------------------------------------------------------------|--------------------------------------------------------------------------------------|----------------------------------------------------------------------------------------|------------------------------------------------------------------------|--------------------------------------------------------------------------------------|----------------------------------------------------------------------------------------|
| formula                                          | C <sub>34</sub> H <sub>21</sub> .2B<br>Cl <sub>0.8</sub> F <sub>15</sub> N <sub>2</sub><br>O <sub>2</sub> Pt | C <sub>35</sub> H <sub>14</sub> BF <sub>15</sub><br>N <sub>2</sub> O <sub>2</sub> Pt | C <sub>38.5</sub> H <sub>21</sub> BF <sub>15</sub><br>N <sub>2</sub> O <sub>2</sub> Pt | C <sub>37</sub> H <sub>20</sub> BF <sub>15</sub><br>N <sub>2</sub> OPt | C <sub>37</sub> H <sub>18</sub> BF <sub>15</sub> N <sub>2</sub><br>O <sub>2</sub> Pt | C <sub>36.5</sub> H <sub>17</sub> BF <sub>15</sub><br>N <sub>2</sub> O <sub>3</sub> Pt |
| fw                                               | 1008.99                                                                                                      | 985.38                                                                               | 1140.82                                                                                | 999.45                                                                 | 1013.43                                                                              | 1057.87                                                                                |
| temp/K                                           | 150(2)                                                                                                       | 150(2)                                                                               | 150(2)                                                                                 | 150(2)                                                                 | 150(2)                                                                               | 150(2)                                                                                 |
| $\lambda$ (Mo K $\alpha$ )/Å                     | 0.71073                                                                                                      | 0.71073                                                                              | 0.71073                                                                                | 0.71073                                                                | 0.71073                                                                              | 0.71073                                                                                |
| cryst syst                                       | Monoclinic                                                                                                   | Monoclinic                                                                           | Triclinic                                                                              | Monoclinic                                                             | Monoclinic                                                                           | Monoclinic                                                                             |
| space group                                      | P2(1)/n                                                                                                      | P2(1)/c                                                                              | P2(1)/c                                                                                | P2(1)/c                                                                | P2(1)/c                                                                              | P2(1)/c                                                                                |
| cell dimens<br><i>a</i> /Å                       | 7.7332(2)                                                                                                    | 11.3484(4)                                                                           | 14.6798(5)                                                                             | 8.5660(2)                                                              | 8.58600(10)                                                                          | 10.4214(3)                                                                             |
| <i>b</i> /Å                                      | 19.3491(5)                                                                                                   | 20.7294(6)                                                                           | 20.7799(6)                                                                             | 17.8544(4)                                                             | 17.7719(4)                                                                           | 15.1698(4)                                                                             |
| <i>c</i> /Å                                      | 23.5497(6)                                                                                                   | 27.3470(9)                                                                           | 25.5737(8)                                                                             | 22.6002(6)                                                             | 22.8225(6)                                                                           | 22.6241(4)                                                                             |
| $\alpha$ /deg                                    | 90                                                                                                           | 90                                                                                   | 90                                                                                     | 90                                                                     | 90                                                                                   | 90                                                                                     |
| $\beta$ /deg                                     | 93.034(2)                                                                                                    | 95.8700                                                                              | 91.802(2)                                                                              | 90.040(2)                                                              | 91.9220(10)                                                                          | 96.695(2)                                                                              |
| $\gamma$ /deg                                    | 90                                                                                                           | 90                                                                                   | 90                                                                                     | 90                                                                     | 90                                                                                   | 90                                                                                     |
| volume/Å <sup>3</sup>                            | 3518.81(16)                                                                                                  | 6399.5(4)                                                                            | 7797.3(4)                                                                              | 3456.49(14)                                                            | 3480.52(13)                                                                          | 3552.27(15)                                                                            |
| Z                                                | 4                                                                                                            | 8                                                                                    | 8                                                                                      | 4                                                                      | 4                                                                                    | 4                                                                                      |
| <i>d</i> (calc)/Mg<br>m <sup>-3</sup>            | 1.905                                                                                                        | 2.045                                                                                | 1.944                                                                                  | 1.921                                                                  | 1.934                                                                                | 1.978                                                                                  |
| abs coeff/<br>mm <sup>-1</sup>                   | 4.164                                                                                                        | 4.512                                                                                | 3.917                                                                                  | 4.176                                                                  | 4.151                                                                                | 4.147                                                                                  |
| <i>F</i> (000)                                   | 1947                                                                                                         | 3776                                                                                 | 4408                                                                                   | 1928                                                                   | 1952                                                                                 | 2036                                                                                   |
| no. of<br>reflns/ind<br>reflns                   | 45149/7197                                                                                                   | 55253/1765<br>0                                                                      | 58886/17756                                                                            | 38148/6096                                                             | 35132/7972                                                                           | 39646/6279                                                                             |
| abs corr                                         | Integration                                                                                                  | Integration                                                                          | Integration                                                                            | Integration                                                            | Integration                                                                          | Integration                                                                            |
| no. of<br>data/restr/para<br>ms                  | 7197/11/46<br>0                                                                                              | 17650/18/8<br>94                                                                     | 17756/8/1043                                                                           | 6096/1/469                                                             | 7972/0/532                                                                           | 6279/0/515                                                                             |
| R1, wR2 [ <i>I</i> ><br>2 $\sigma$ ( <i>I</i> )] | 0.0457,<br>0.1175                                                                                            | 0.0599,<br>0.1309                                                                    | 0.0605,<br>0.1380                                                                      | 0.0356,<br>0.0813                                                      | 0.0354,<br>0.0780                                                                    | 0.0353, 0.0845                                                                         |

|                                               | <b>9a</b><br>0.5CH <sub>2</sub> Cl <sub>2</sub>                                           | <b>10a</b><br>0.5CH <sub>2</sub> Cl <sub>2</sub>                                         | <b>3b</b>                                                                         |
|-----------------------------------------------|-------------------------------------------------------------------------------------------|------------------------------------------------------------------------------------------|-----------------------------------------------------------------------------------|
| formula                                       | C <sub>37.5</sub> H <sub>19</sub> BCl<br>F <sub>15</sub> N <sub>2</sub> O <sub>4</sub> Pt | C <sub>37.5</sub> H <sub>19</sub> BClF <sub>15</sub> N <sub>2</sub> O <sub>3</sub><br>Pt | C <sub>30</sub> H <sub>13</sub> BF <sub>15</sub> N <sub>3</sub> O <sub>2</sub> Pt |
| fw                                            | 1087.90                                                                                   | 1071.90                                                                                  | 938.33                                                                            |
| temp/K                                        | 150(2)                                                                                    | 150(2)                                                                                   | 150(2)                                                                            |
| $\lambda$ (Mo K $\alpha$ )/Å                  | 0.71073                                                                                   | 0.71073                                                                                  | 0.71073                                                                           |
| cryst syst                                    | Triclinic                                                                                 | Monoclinic                                                                               | Monoclinic                                                                        |
| space group                                   | P2(1)/c                                                                                   | P2(1)/c                                                                                  | C2/c                                                                              |
| cell dimens <i>a</i> /Å                       | 10.6163(4)                                                                                | 10.4892(3)                                                                               | 37.1201(15)                                                                       |
| <i>b</i> /Å                                   | 15.4527(6)                                                                                | 15.4986(5)                                                                               | 7.3349(3)                                                                         |
| <i>c</i> /Å                                   | 22.3982(2)                                                                                | 22.3102(6)                                                                               | 23.0216(9)                                                                        |
| $\alpha$ /deg                                 | 90                                                                                        | 90                                                                                       | 90                                                                                |
| $\beta$ /deg                                  | 92.257(2)                                                                                 | 95.735(2)                                                                                | 106.850 (2)                                                                       |
| $\gamma$ /deg                                 | 90                                                                                        | 90                                                                                       | 90                                                                                |
| volume/Å <sup>3</sup>                         | 3671.6(3)                                                                                 | 3608.77(18)                                                                              | 5999.0(4)                                                                         |
| <i>Z</i>                                      | 4                                                                                         | 4                                                                                        | 8                                                                                 |
| <i>d</i> (calc)/Mg m <sup>-3</sup>            | 1.968                                                                                     | 1.973                                                                                    | 2.078                                                                             |
| abs coeff/mm <sup>-1</sup>                    | 4.017                                                                                     | 4.083                                                                                    | 4.808                                                                             |
| <i>F</i> (000)                                | 2100                                                                                      | 2068                                                                                     | 3584                                                                              |
| no. of reflns/ind reflns                      | 31649/6386                                                                                | 34948/6347                                                                               | 26807/5275                                                                        |
| abs corr                                      | Integration                                                                               | Integration                                                                              | Integration                                                                       |
| no. of data/restr/params                      | 6386/0/532                                                                                | 6347/2/523                                                                               | 5275/0/431                                                                        |
| R1, wR2 [ <i>I</i> > 2 $\sigma$ ( <i>I</i> )] | 0.0416, 0.0844                                                                            | 0.0680,<br>0.1690                                                                        | 0.0402, 0.0943                                                                    |

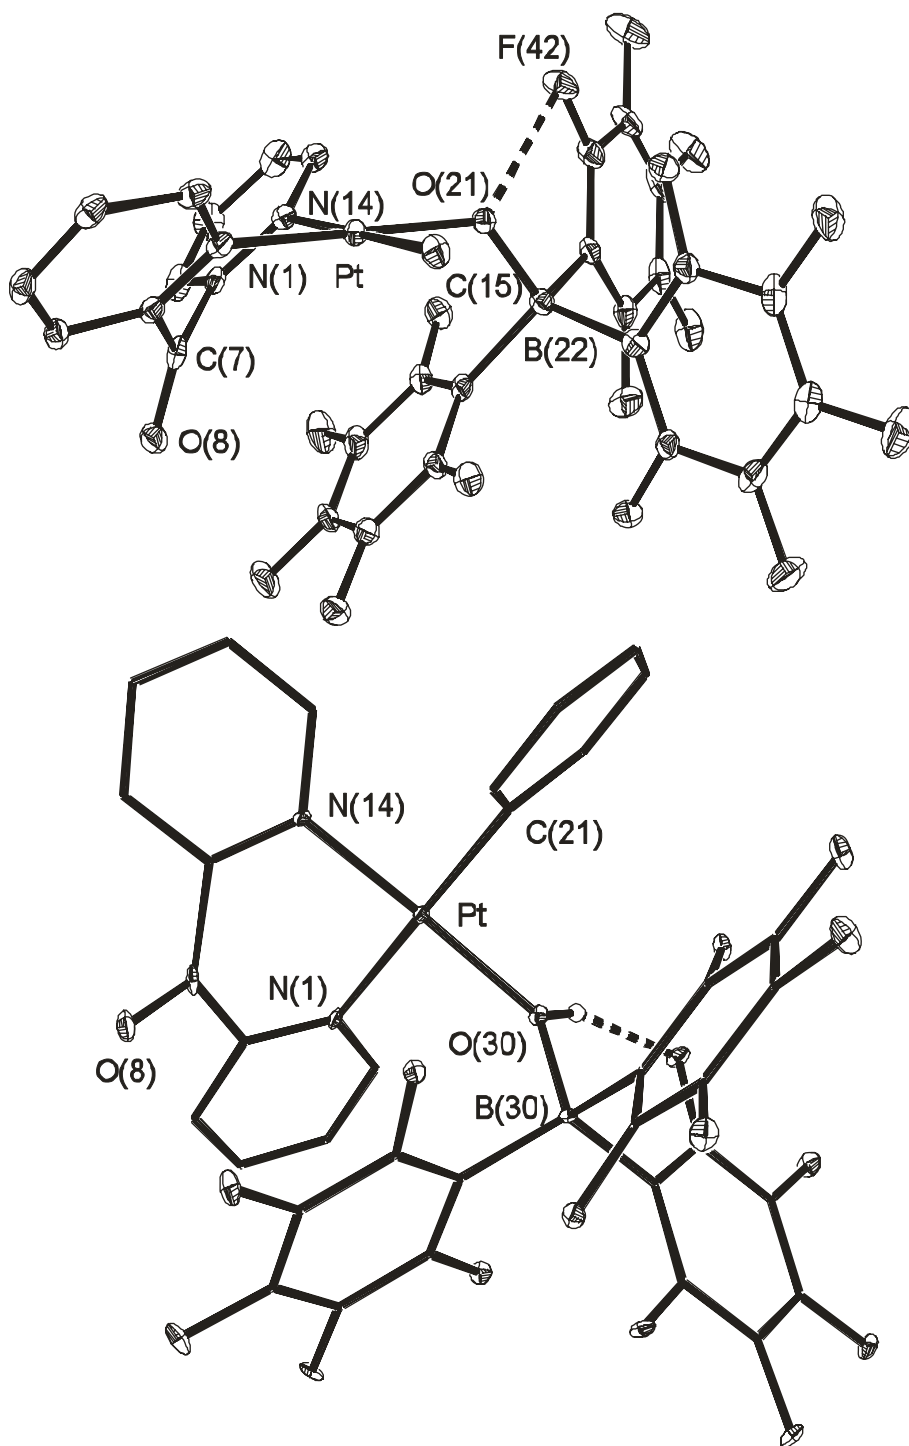Structures of complexes **2a** and **4a**



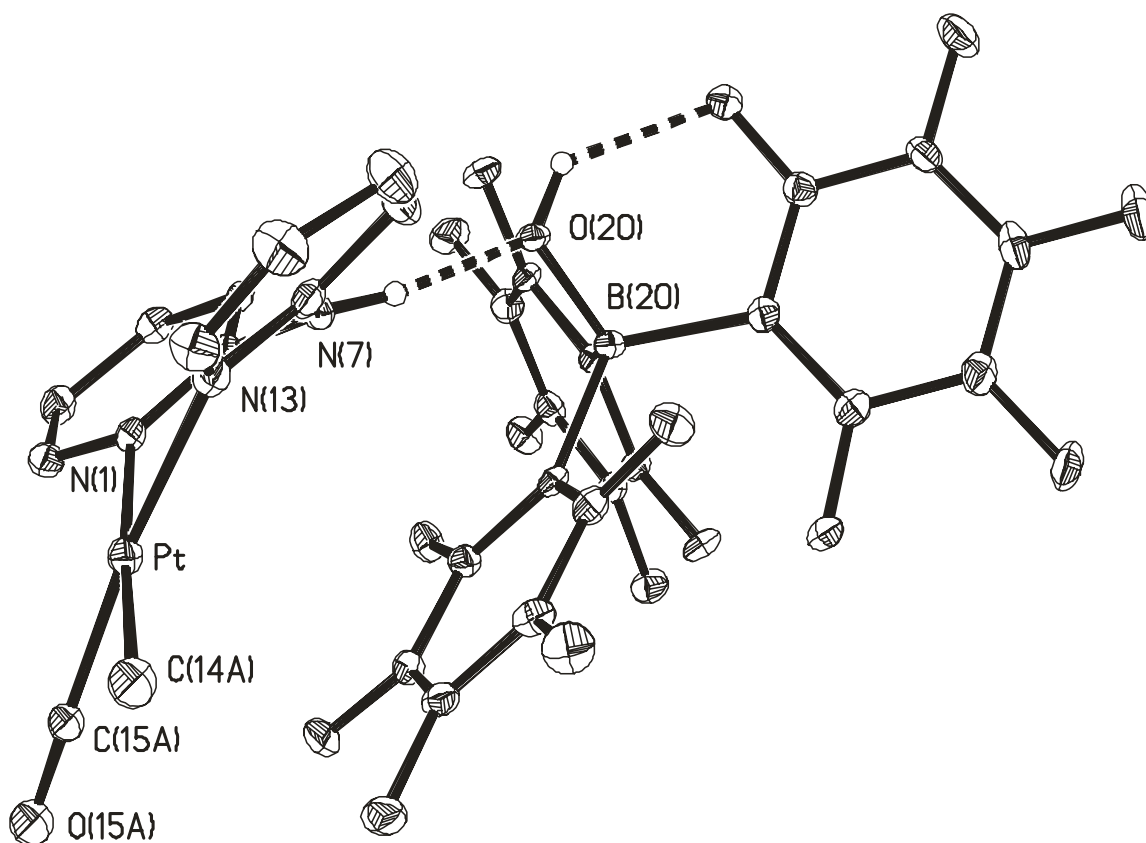

Structure of complex **3b**

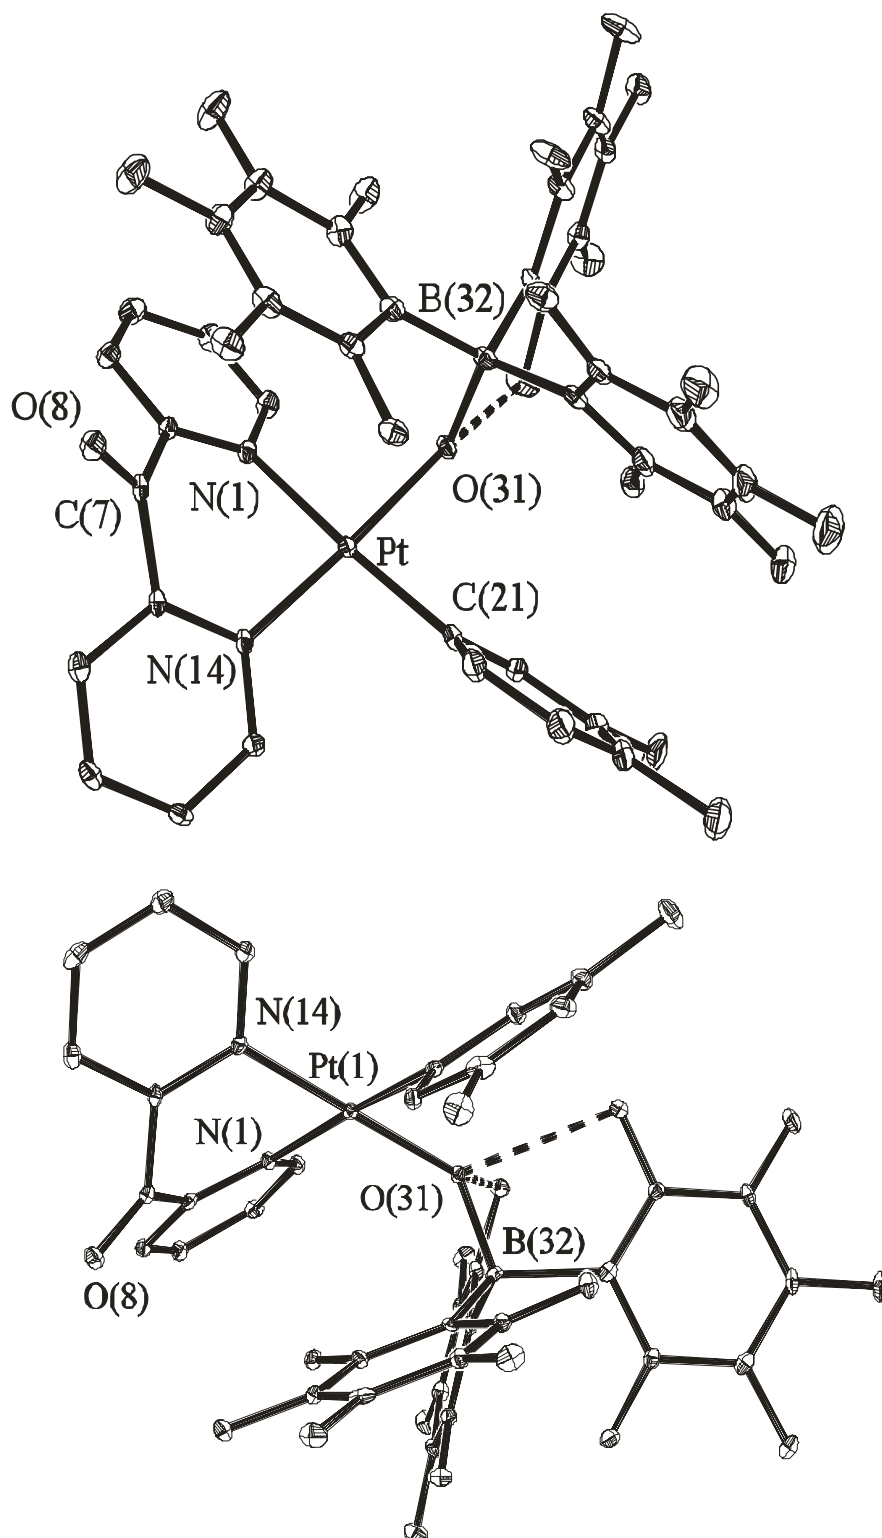Structures of complexes **6a** and **7a**

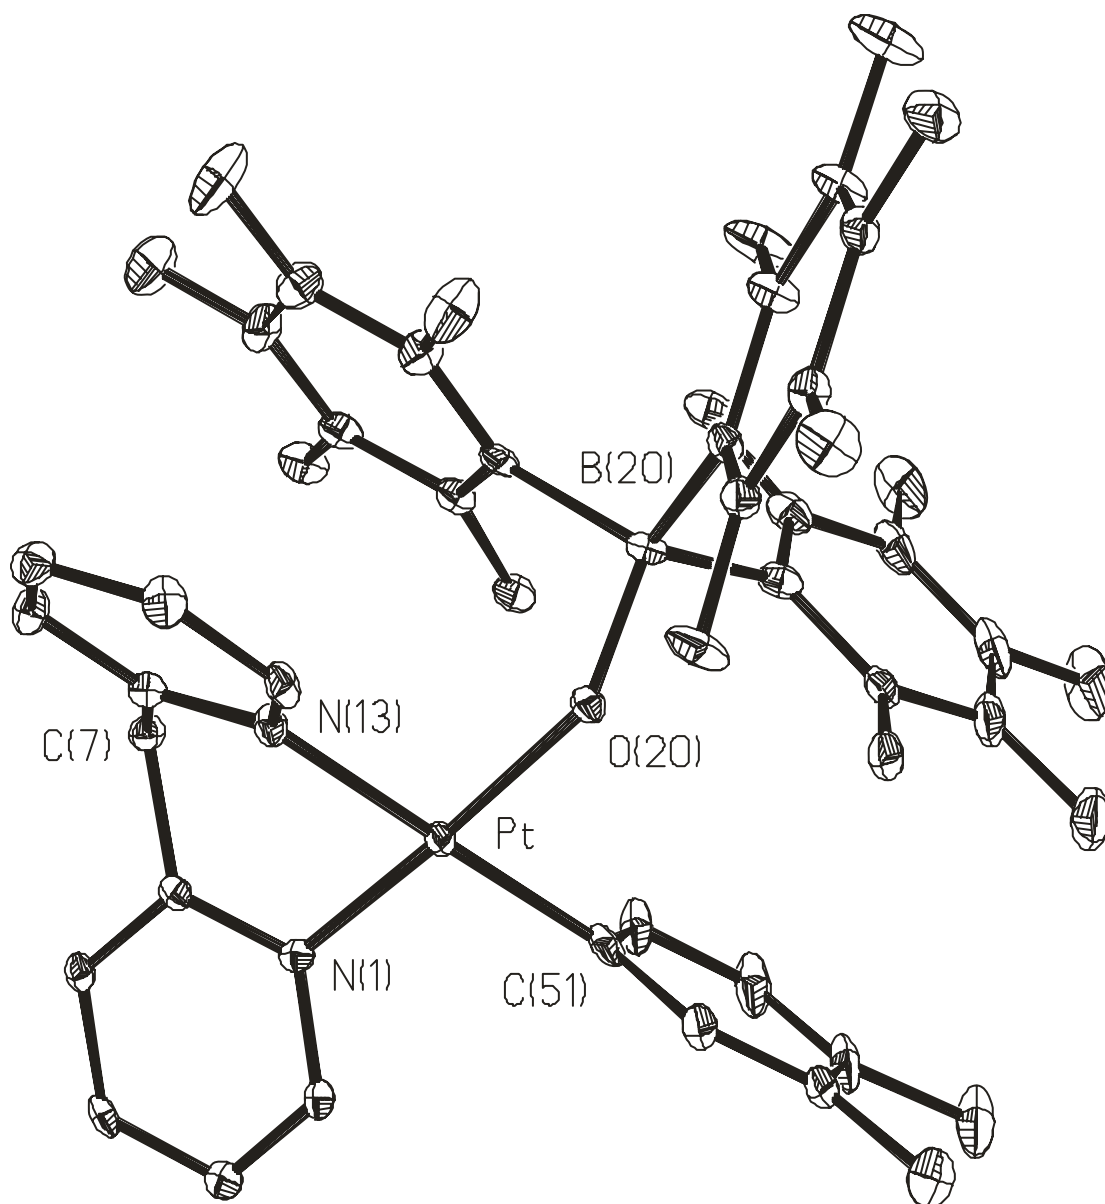Structure of complex **6c**

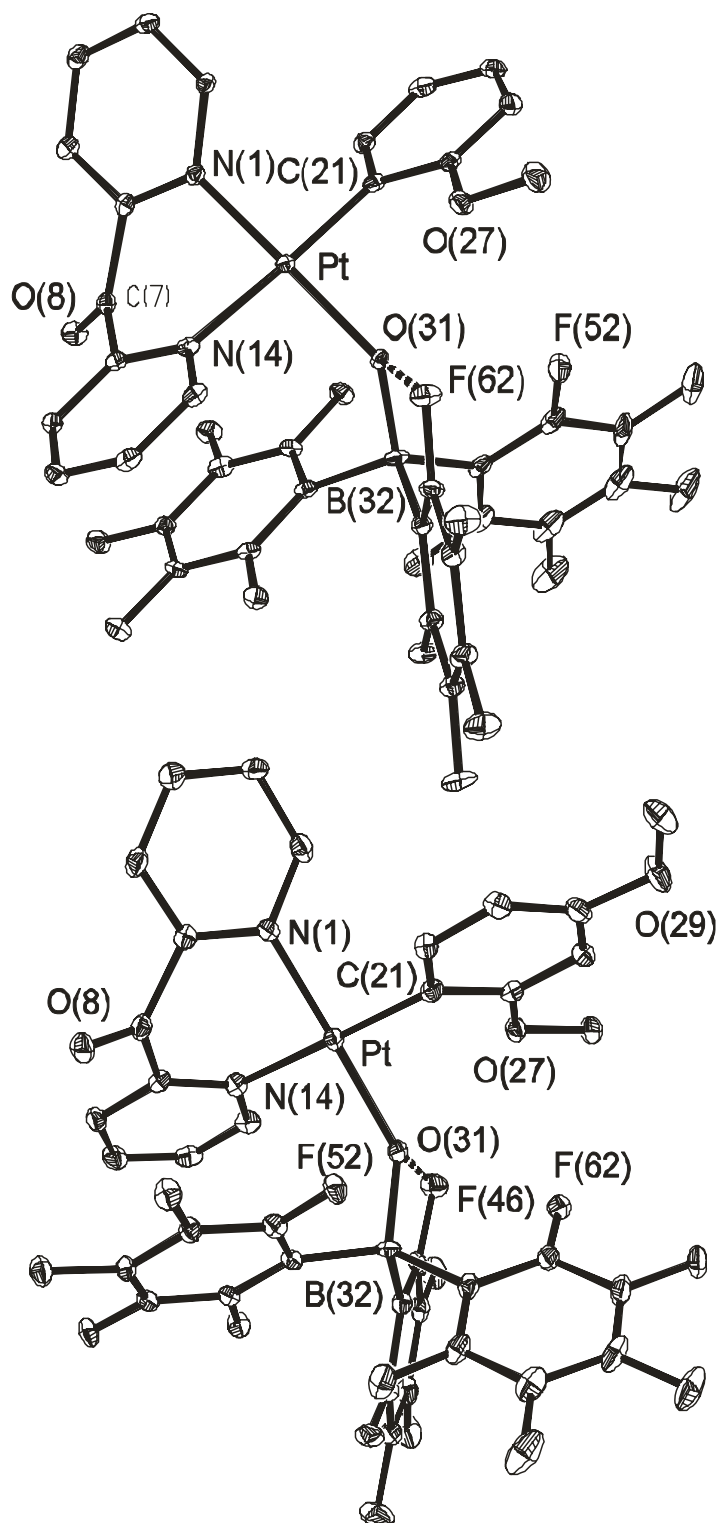Structures of complexes **8a** and **9a**

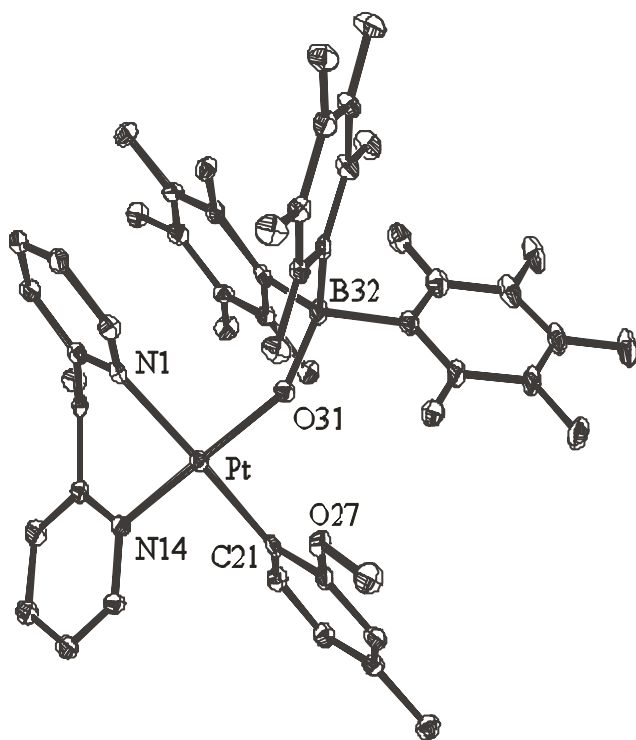Structure of complex **10a**
